# Supplementary material for: A Propensity-Matched Retrospective Comparative Study with Historical Control to Determine the Real-World Effectiveness of Durvalumab after Concurrent Chemoradiotherapy in Unresectable Stage III Non-Small Cell Lung Cancer
Source: MDPI journal article supplement (doi:10.3390/cancers15051606), 2023-03-05
Supplement: s1 [file s1]

**Supplementary Table S1.** Post-treatment progression pattern and subsequent treatment in patients with CCRT alone and durvalumab consolidation (DC).

| Variables                             | Total (n=162) | CCRT Alone (n=119) | DC (n=43) | p-Value |
|---------------------------------------|---------------|--------------------|-----------|---------|
| Progression type                      |               |                    |           |         |
| Localized/Regional                    | 68 (42.0)     | 52 (43.7)          | 16 (37.2) | 0.223   |
| Distant                               | 74 (45.7)     | 50 (42.0)          | 24 (55.8) |         |
| Unknown or Death                      | 20 (12.3)     | 17 (14.3)          | 3 (7.0)   |         |
| Progression site                      |               |                    |           | -       |
| Lung                                  | 85 (52.5)     | 62 (52.1)          | 23 (53.5) | 0.876   |
| Lymph node                            | 59 (36.4)     | 44 (37.0)          | 15 (34.9) | 0.807   |
| Pleura                                | 15 (9.3)      | 12 (10.1)          | 3 (7.0)   | 0.761   |
| Pericardium                           | 4 (2.5)       | 3 (2.5)            | 1 (2.3)   | 1.000   |
| Brain                                 | 26 (16.0)     | 18 (15.1)          | 8 (18.6)  | 0.594   |
| Bone                                  | 14 (8.6)      | 10 (8.4)           | 4 (9.3)   | 1.000   |
| Kidney                                | 3 (1.9)       | 0 (0.0)            | 3 (7.0)   | 0.018   |
| Adrenal                               | 7 (4.3)       | 5 (4.2)            | 2 (4.7)   | 1.000   |
| Liver                                 | 12 (7.4)      | 9 (7.6)            | 3 (7.0)   | 1.000   |
| Spleen                                | 1 (0.6)       | 0 (0.0)            | 1 (2.3)   | 0.265   |
| Pancreas                              | 2 (1.2)       | 1 (0.8)            | 1 (2.3)   | 0.462   |
| Peritoneum                            | 3 (1.9)       | 3 (2.5)            | 0 (0.0)   | 0.566   |
| Unknown                               | 7 (4.3)       | 5 (4.2)            | 2 (4.7)   | 1.000   |
| Post-PD treatment                     |               |                    |           | 0.010   |
| Local: OP, RT                         | 39 (24.1)     | 29 (24.4)          | 10 (23.3) |         |
| Systemic: CRT, Chemotherapy, TKI, ICI | 82 (50.6)     | 53 (44.5)          | 29 (67.4) |         |
| BSC or loss of follow up              | 41 (25.3)     | 37 (31.1)          | 4 (9.3)   |         |

Values are presented as numbers (%). CCRT: concurrent chemoradiotherapy; PD: progressive disease; OP: operation; RT: radiotherapy; CRT: chemoradiotherapy; TKI: tyrosine kinase inhibitor; ICI: immune checkpoint inhibitor; BSC: best supportive care.

**Supplementary Table S2.** Multivariable Cox regression analysis for PFS and OS.

| Variables                      | PFS   |                | OS    |                |
|--------------------------------|-------|----------------|-------|----------------|
|                                | HR    | 95% CI         | HR    | 95% CI         |
| DC                             | 0.631 | 0.416 - 0.957  | 0.469 | 0.270 - 0.815  |
| Anemia                         | 1.214 | 0.779 - 1.891  | 0.818 | 0.475 - 1.407  |
| Thrombocytopenia               | 0.659 | 0.249 - 1.741  | 0.474 | 0.104 - 2.153  |
| Liver failure                  | 0.808 | 0.351 - 1.858  | 0.649 | 0.191 - 2.210  |
| BMI (18.5 – 25)                | Ref   | Ref            | Ref   | Ref            |
| BMI < 18.5                     | 1.041 | 0.485 - 2.236  | 1.128 | 0.452 - 2.814  |
| 25 ≤ BMI                       | 0.740 | 0.441 - 1.241  | 0.670 | 0.355 - 1.264  |
| eGFR (≥90)                     | Ref   | Ref            | Ref   | Ref            |
| 0≤eGFR <60                     | 1.313 | 0.505 - 3.419  | 1.387 | 0.480 - 4.008  |
| 60≤eGFR<90                     | 1.045 | 0.658 - 1.658  | 1.235 | 0.694 - 2.200  |
| Smoking (never)                | Ref   | Ref            | Ref   | Ref            |
| Current smoker                 | 1.155 | 0.509 - 2.618  | 1.803 | 0.529 - 6.150  |
| Ex-smoker                      | 1.339 | 0.615 - 2.916  | 1.555 | 0.468 - 5.168  |
| ECOG PS score (0 or 1)         | Ref   | Ref            | Ref   | Ref            |
| 2                              | 1.850 | 0.700 - 4.885  | 3.729 | 1.228 - 11.318 |
| Unknown                        | 0.609 | 0.232 - 1.600  | 1.089 | 0.360 - 3.295  |
| COPD                           | 0.867 | 0.416 - 0.957  | 0.728 | 0.396 - 1.338  |
| Histologic type (non-squamous) | Ref   | Ref            | Ref   | Ref            |
| Squamous                       | 0.869 | 0.555- 1.365   | 1.206 | 0.687 - 2.117  |
| Stage (IIIA)                   | Ref   | Ref            | Ref   | Ref            |
| IIIB                           | 1.639 | 1.014- 2.651   | 2.154 | 1.172 - 3.958  |
| IIIC                           | 1.980 | 1.008 – 3.889  | 1.522 | 0.684 - 3.385  |
| History of surgery             | 0.614 | –0.208 – 1.812 | 0.723 | 0.158 - 3.305  |
| History of other cancer        | 2.091 | –0.875 – 4.996 | 2.606 | 0.905 - 7.502  |
| Patient age                    | 1.000 | 0.972- 1.030   | 1.030 | 0.993 - 1.068  |
| Gender                         | 0.431 | 0.133 - 1.393  | 0.148 | 0.015 - 1.487  |
| RT fraction                    | 1.153 | 0.935- 1.421   | 0.934 | 0.752 - 1.161  |
| RT dose in Gy                  | 0.951 | 0.880 – 1.029  | 0.938 | 0.854 - 1.031  |

PFS: progression-free survival; OS: overall survival; HR: hazard ratio; CI: confidence interval; DC, durvalumab consolidation; BMI: body mass index; eGFR: estimated glomerular filtration rate; ECOG: Eastern Cooperative Oncology Group; PS: performance status; COPD: chronic obstructive pulmonary disease; RT, radiotherapy.
