# Supplementary figures and images for: A Propensity-Matched Retrospective Comparative Study with Historical Control to Determine the Real-World Effectiveness of Durvalumab after Concurrent Chemoradiotherapy in Unresectable Stage III Non-Small Cell Lung Cancer
Source: MDPI journal article supplement (doi:10.3390/cancers15051606), 2023-03-05

b

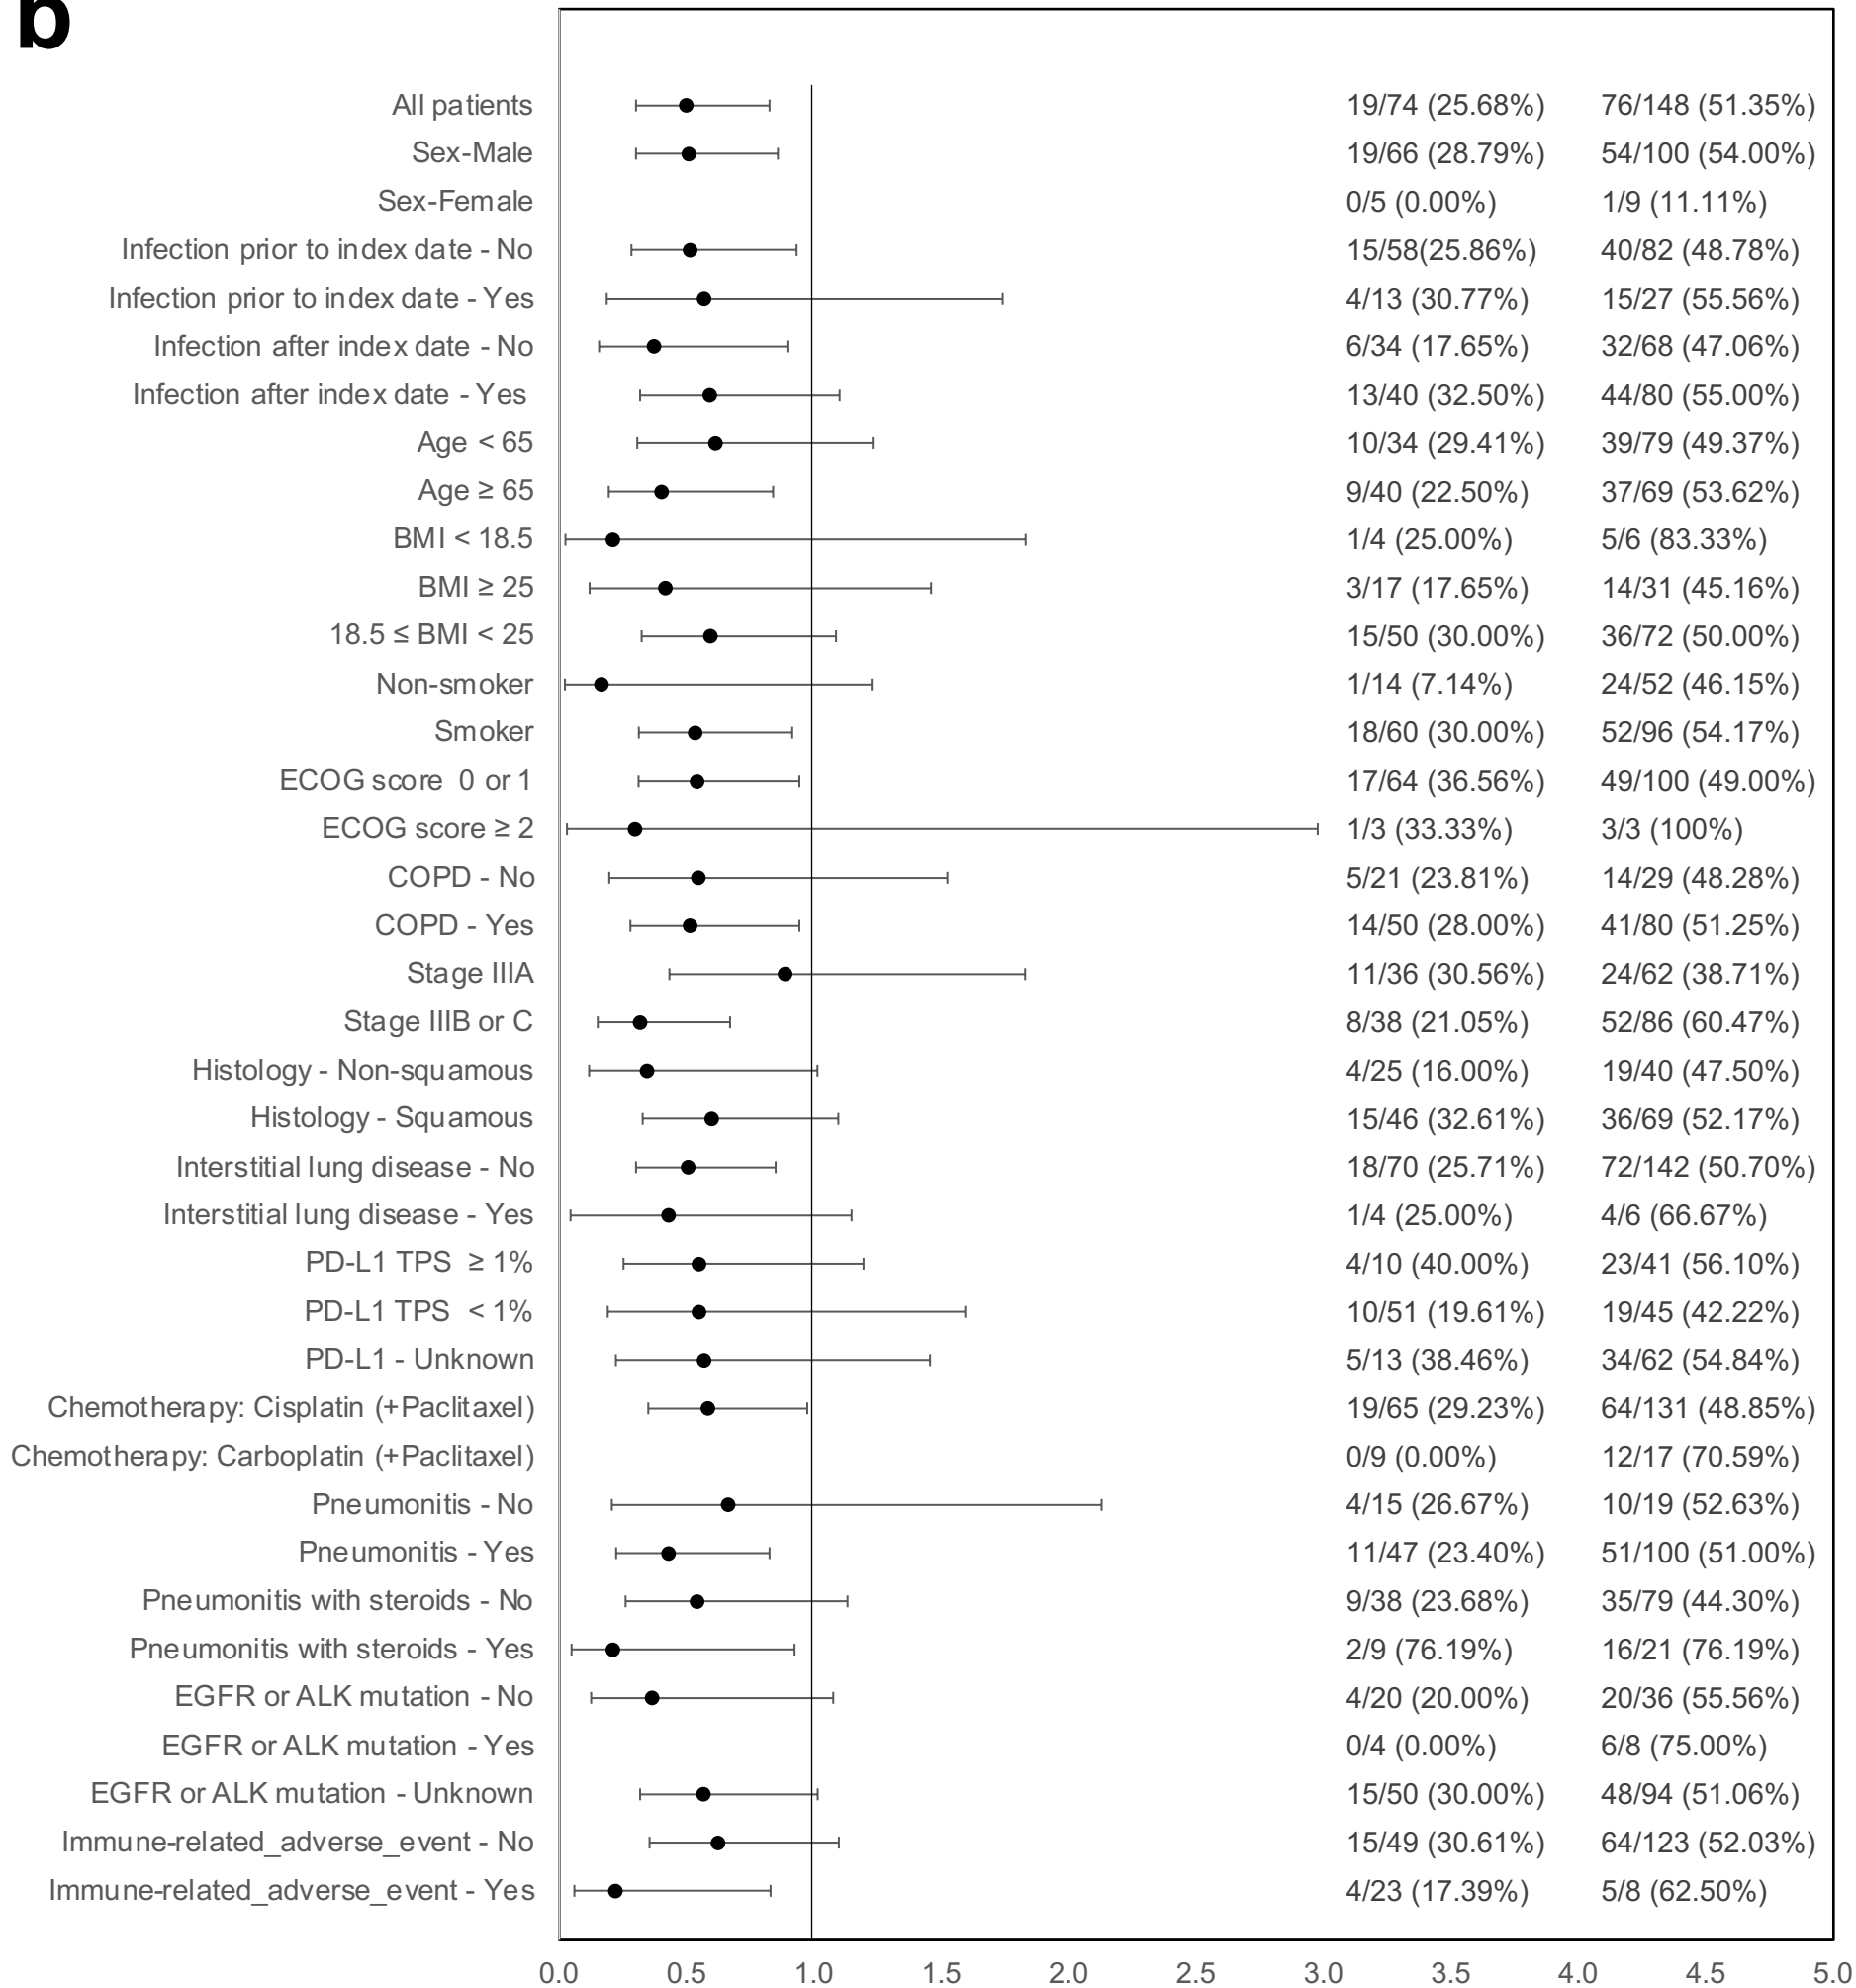

Supplement: s1 [file s1]

a

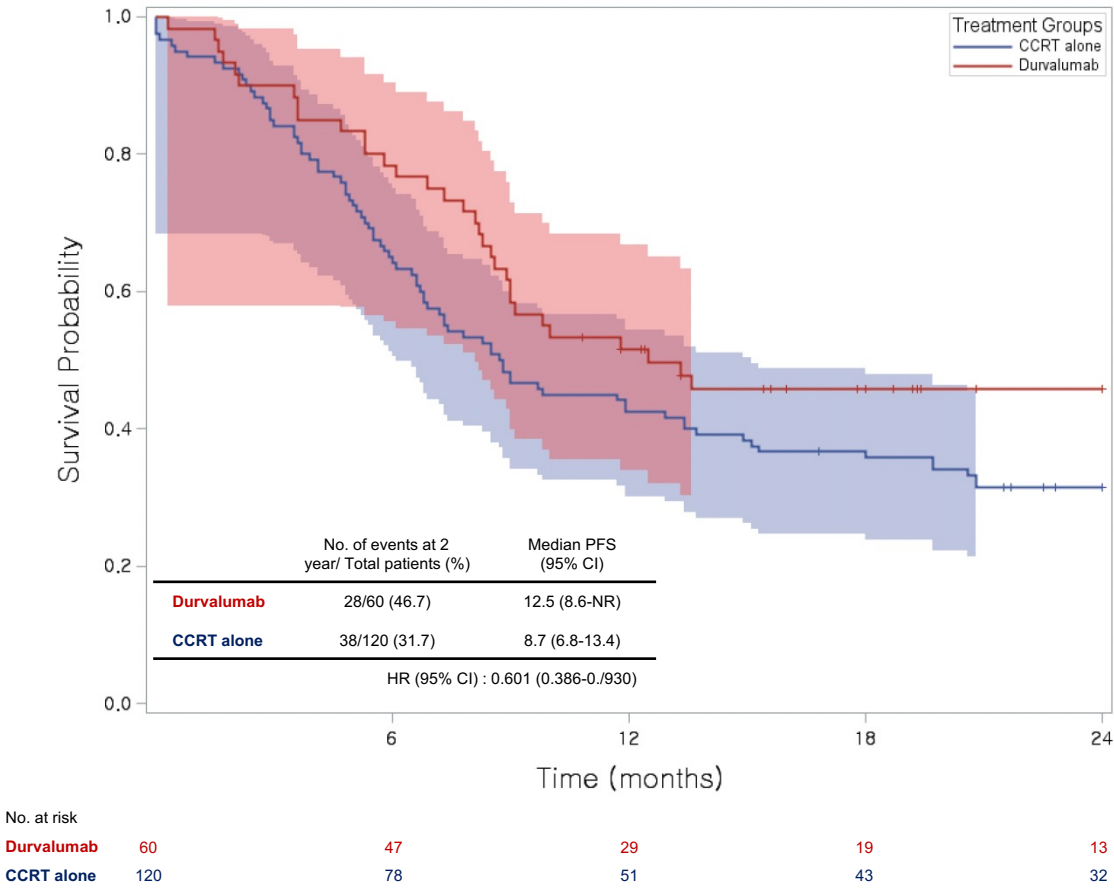

b

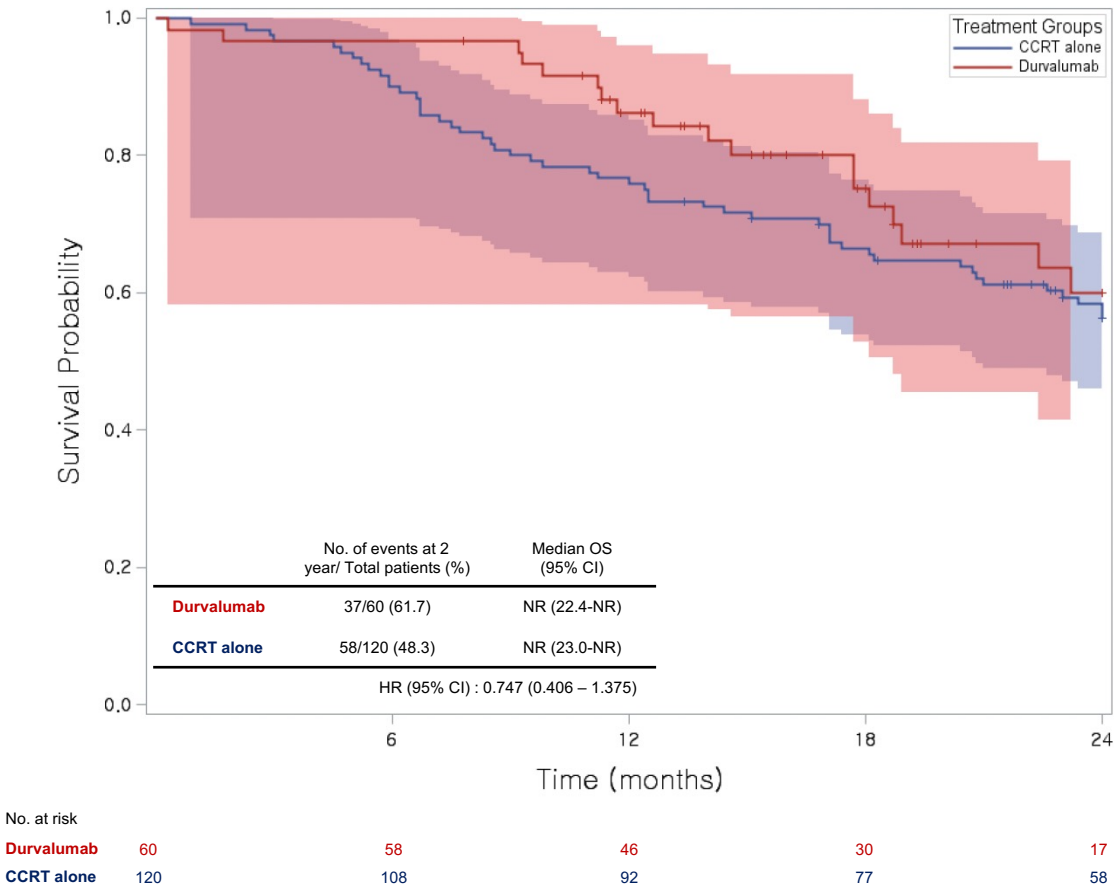

Supplement: s1 [file s1]

a

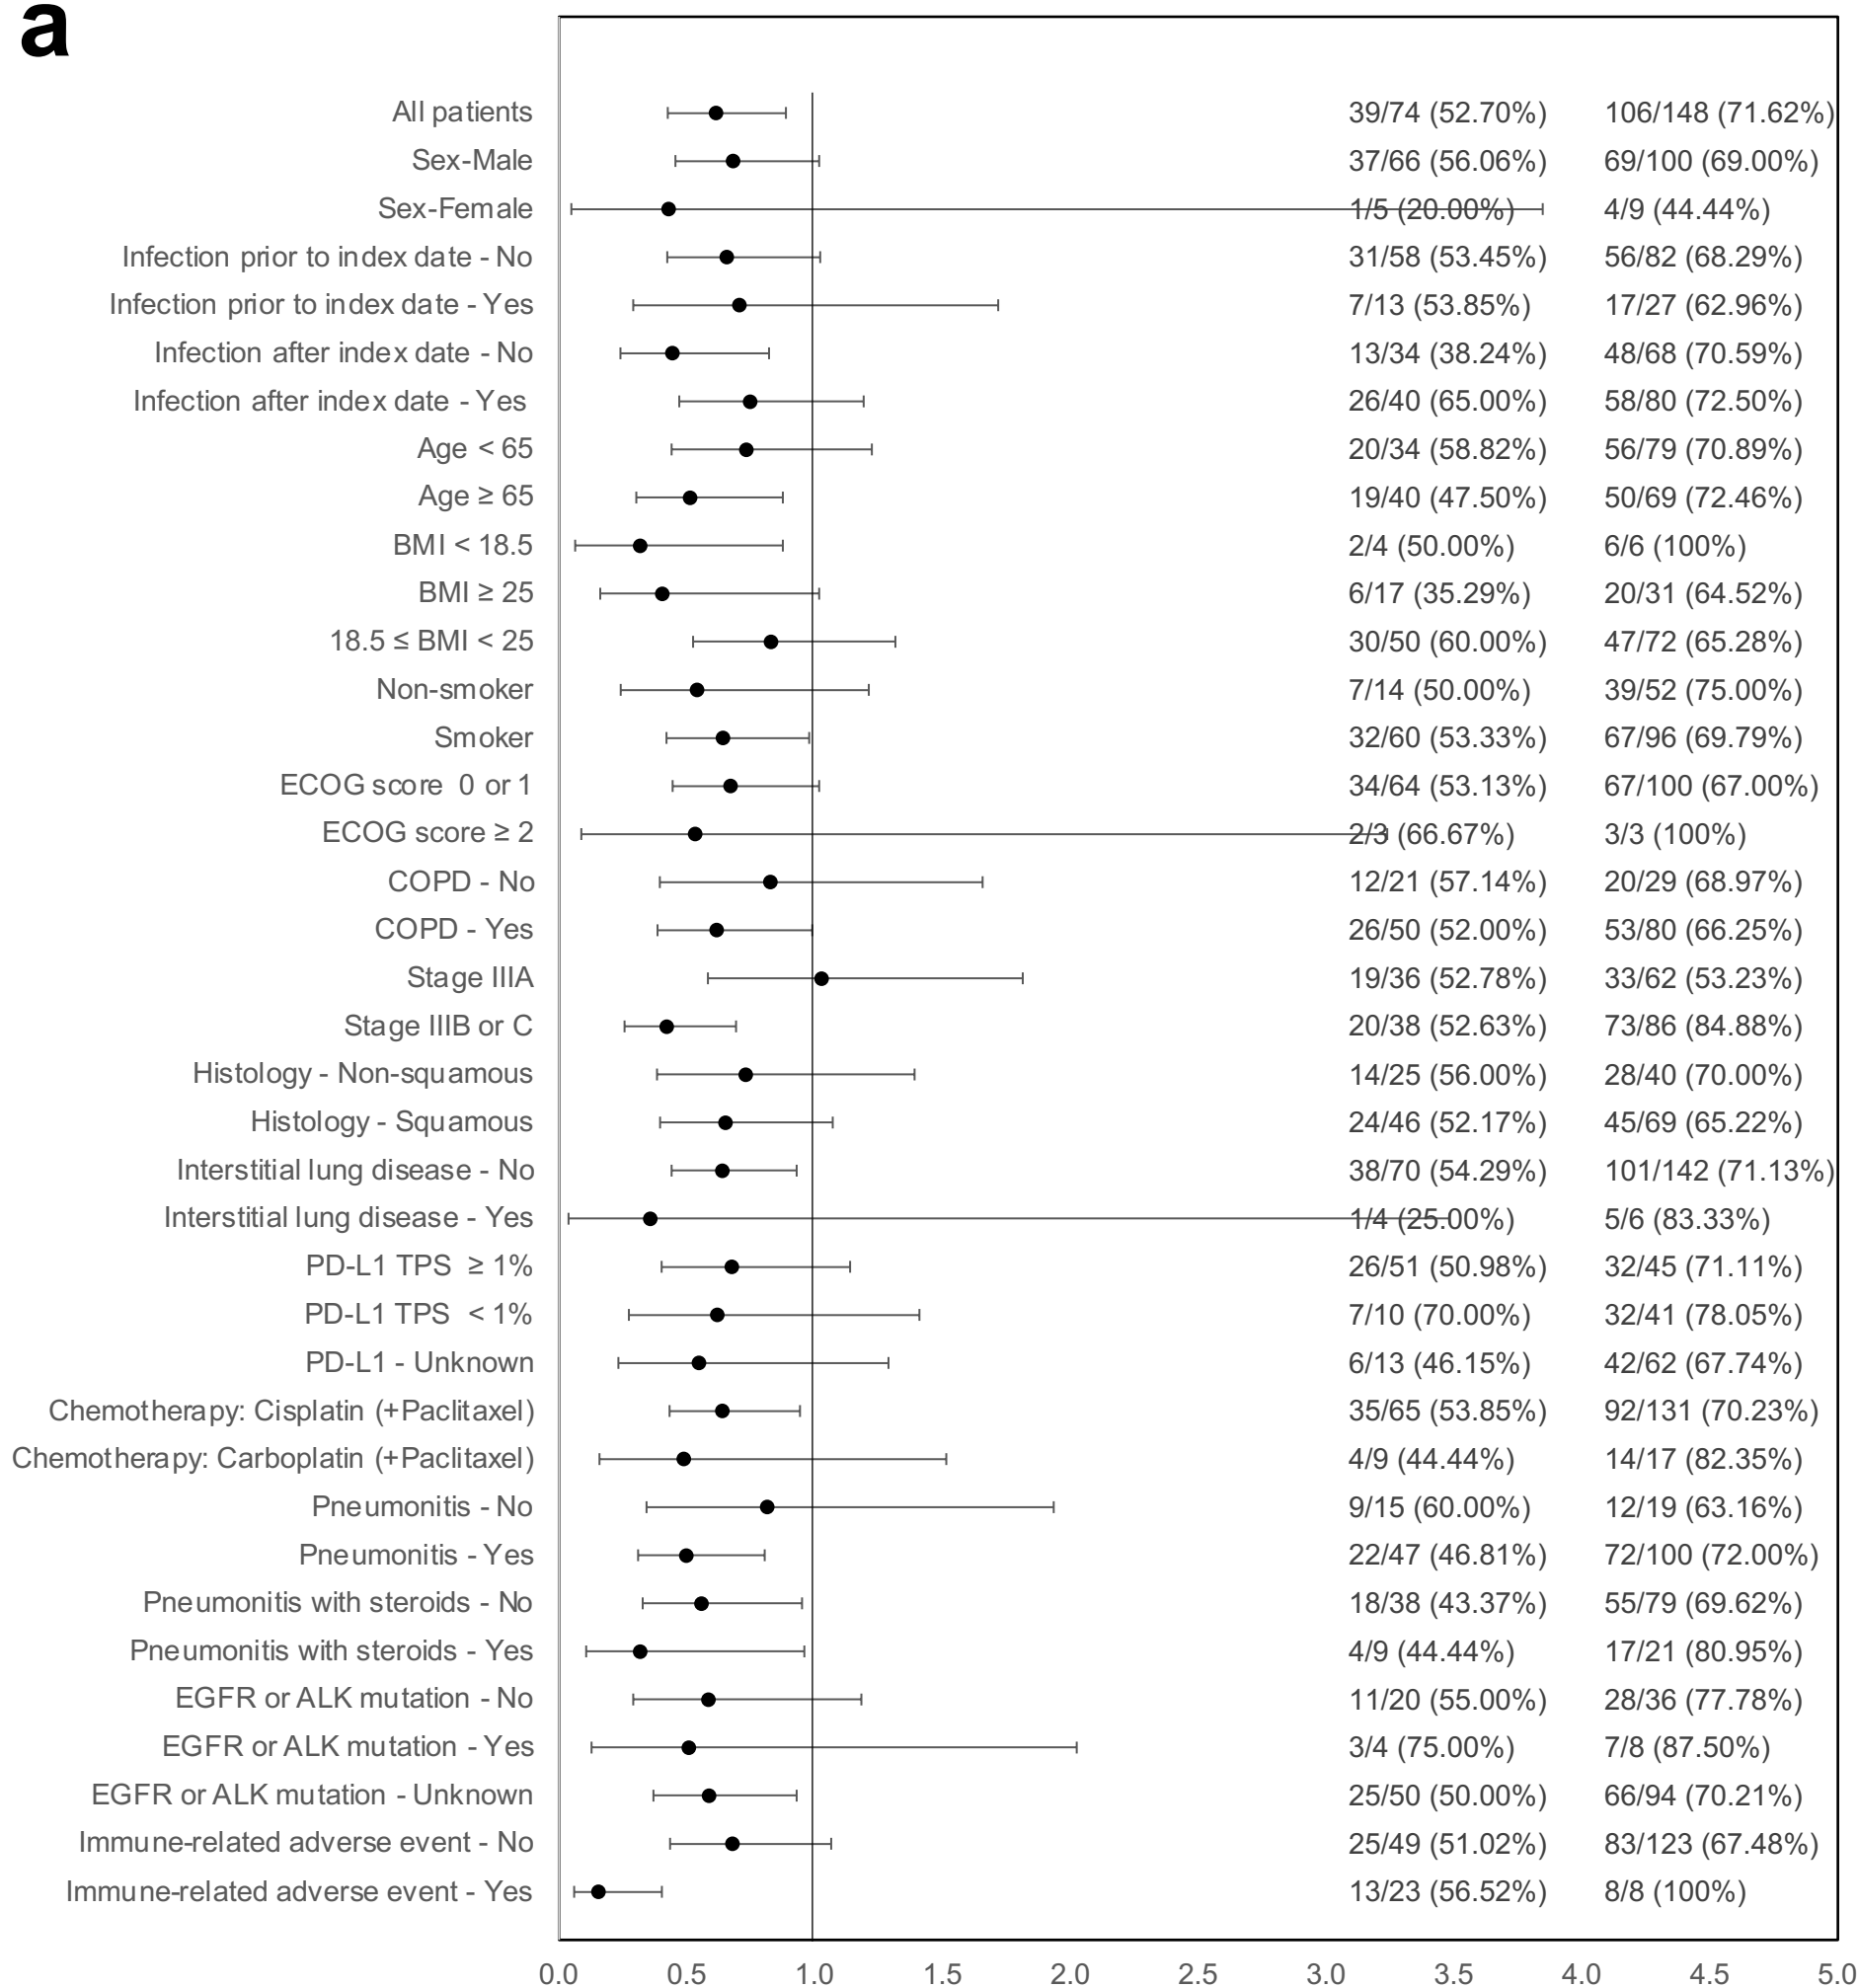

Supplement: s1 [file s1]
